# Supplementary material
Source: Springer Nature journal article supplement (https://www.springermedizin.de/resource/supplementary/12943_2012_1032_MOESM3_ESM.pdf/9552124)

G G A T T T T G C/T G T T C/T G T T A G T T T C/T G T A G G G

NB69

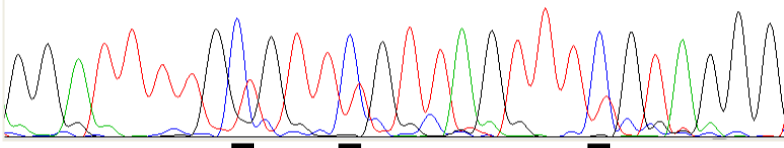

G G A T T T T G C/T G T T C/T G T T A G T T T C/T G T A G G G

IMR-32

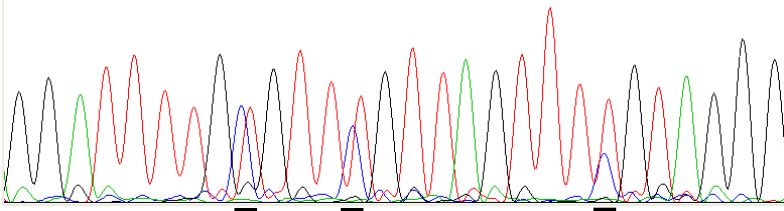

Supplement: MOESM3 [file 9552124]
